# Supplementary material for: Teleguidance Technology for Endotracheal Intubation: A Scoping Review
Source: PubMed Central journal article supplement — Crit Care Explor. 2021 Dec 9;3(12):e0582. doi: 10.1097/CCE.0000000000000582 (PMC8663862; doi:10.1097/cce.0000000000000582), 2021-12-09
Supplement: cc9-3-e0582-s001.pdf [file cc9-3-e0582-s001.pdf]

**Supplemental Table 1. Summary of studies focusing on procedural tele-mentoring or tele-supervision.**

| Year | Author            | Title                                                                                                                                                                           | Study Type and setting                                            | Study Design                                                                                                           | Video conferencing software                                                                                  | Laryngoscope | Outcome and result                                                                                                                                                                                                                                    |
|------|-------------------|---------------------------------------------------------------------------------------------------------------------------------------------------------------------------------|-------------------------------------------------------------------|------------------------------------------------------------------------------------------------------------------------|--------------------------------------------------------------------------------------------------------------|--------------|-------------------------------------------------------------------------------------------------------------------------------------------------------------------------------------------------------------------------------------------------------|
| 2012 | Abadia De Barbara | Virtual Simulation Training Using the Storz C-Hub to Support Distance Airway Training for the Spanish Medical Corps and NATO Partners                                           | Proof of technology demonstration, simulation environment         | Remote laryngoscopy training                                                                                           | Spanish Military telemedicine System                                                                         | Storz C-Mac  | Technology demonstration as part of ongoing study of educational effectiveness                                                                                                                                                                        |
| 2009 | Berg              | Remote Video laryngoscopy Skills Training for Pre-hospital Personnel                                                                                                            | Prospective trial, simulation environment                         | Comparing remote education to face to face mentoring                                                                   | Non-commercial system via laptop                                                                             | Storz C-Mac  | Time to intubation and intubation success between face to face mentoring and tele-mentoring. No difference between remote mentoring and face to face mentoring                                                                                        |
| 2011 | Boedeker          | The combined use of Skype and the STORZ CMAC video laryngoscope in field intubation training with the Nebraska National Air Guard                                               | Proof of technology demonstration, simulation environment         | Tele-supervision of intubating manikins using video laryngoscopy                                                       | Skype                                                                                                        | Storz C-Mac  | Assessed participants ability to see the laryngoscope and hear and quality of teaching via skype using a likert scale. Participants reported an average of 9.5/10 for education quality, and all participants could hear and 11/12 could see clearly. |
| 2014 | Brannecki         | Use of Transatlantic Telebroncoscopy to Confirm Proper Endotracheal Tube Placement During a Simulation Chemical, Biological, Radiological or Nuclear or Explosive (CBRNE) Event | Proof of technology demonstration study, simulation environment   | Telebroncoscopy to confirm intubation after novice user performed direct laryngoscopy                                  | Adobe Connect                                                                                                | Storz C-Mac  | Remote supervisor able to confirm correct placement in all cases.                                                                                                                                                                                     |
| 2011 | Cho               | A Pilot study of the Tele-Airway Management System in a hospital emergency department                                                                                           | Prospective, non-inferiority study, Emergency department patients | Tele-present mentoring compared to on scene direction for intubation using video laryngoscopy                          | Non-commercial system connected via laptop. Two camera set up to observe video laryngoscope and practitioner | Glidescope   | Primary outcome was time to intubation and success rate. No difference between groups of time to intubation or success rate.                                                                                                                          |
| 2007 | Chung             | A comprehensive telemedicine system for remote guidance of emergency airway management                                                                                          | Prospective, simulation environment                               | Tele-presence mentoring compared to video laryngoscopy alone for intubations performed on a manikin by novice learners | Non-commercial system. Two camera set up to observe video laryngoscope and practitioner                      | Glidescope   | Primary outcome was rate of successful intubation by novice intubators. Found that tele-presence with video laryngoscopy had a faster time to                                                                                                         |

|      |              |                                                                                                                                                          |                                                                  |                                                                                           |                                                         |                                      |                                                                                                                                                                                                                  |
|------|--------------|----------------------------------------------------------------------------------------------------------------------------------------------------------|------------------------------------------------------------------|-------------------------------------------------------------------------------------------|---------------------------------------------------------|--------------------------------------|------------------------------------------------------------------------------------------------------------------------------------------------------------------------------------------------------------------|
|      |              |                                                                                                                                                          |                                                                  |                                                                                           |                                                         |                                      | intubation and higher rate of first pass success when compared to video laryngoscopy alone.                                                                                                                      |
| 2006 | Cone         | Remote anesthetic monitoring using satellite telecommunications and the internet                                                                         | Proof of technology demonstration, anesthetized patients         | Monitoring of anesthesia via video transmission and vital signs transmission              | Microsoft Net Meeting                                   | TrachView                            | Proof of concept that vital signs and laryngoscopy could be transmitted to remote monitoring                                                                                                                     |
| 2020 | Foronda      | Teaching and Learning the Skill of Intubation Using Telehealth Glasses                                                                                   | Proof of technology demonstration, simulation environment        | Using telehealth glasses to provide remote education during simulated intubation          | Not-specified telehealth glasses                        | Direct laryngoscopy                  | Survey results of learners reactions. Overall found that the remote mentoring was an advantage and beneficial but there were issues with technology.                                                             |
| 2012 | Irizarry     | Telementoring for Airway Management between a Far Forward Special Operations Location to a Major Medical Center Using Inexpensive Telemedicine Solutions | Proof of technology demonstration, simulation environment        | Using videoconference software to guide inexperienced trainees through intubating manikin | Adobe connect, secondary camera to observe practitioner | Storz C-Mac                          | Successful guidance of intubation and training of novice user. Two subjects both able to successfully intubate manikins                                                                                          |
| 2013 | Mosier       | Telebation: Next-Generation Telemedicine in Remote Airway Management Using Current Wireless Technology                                                   | Proof of technology demonstration, emergency department patients | Telementoring of intubations in ED using videoconference software                         | Skype, Apple FaceTime, Tango                            | Glidescope, Storz C-Mac, King Vision | Videoconference software offered a feasible platform for tele-mentoring. Reported that all intubations were successful. Rated video and audio quality of different software, found FaceTime to be highest rated. |
| 2016 | Perez Alonso | Randomized clinical simulation trial of a Google glass telemedicine application to assist orotracheal intubation                                         | Prospective trial, simulation environment                        | Videoconference used to supervise unskilled user intubating compared to no supervision    | Google Glasses                                          | Direct laryngoscopy                  | Remote supervision had faster time to intubation and higher success rate.                                                                                                                                        |
| 2015 | Prescher     | Telepresent intubation supervision is as effective as in-person supervision of procedurally naïve operators.                                             | Prospective, simulation environment                              | Telepresence vs in person supervision of novices intubating a manikin                     | Apple FaceTime                                          | Storz C-Mac                          | Primary outcome was time to intubation which was not different between the groups                                                                                                                                |
| 2011 | Sakles       | Telemedicine and Telepresence for Prehospital and Remote Hospital Tracheal Intubation Using a GlideScope Video laryngoscope: A Model for Tele-Intubation | Proof of technology demonstration, Emergency department patients | Telemonitoring of intubations at remote hospitals                                         | Non-commercial system, existing telehealth system       | Glidescope                           | Successful intubation, framework for further teleintubation studies or clinical practice                                                                                                                         |
| 2008 | Sibert       | The Feasibility of Using Ultrasound and Video Laryngoscopy                                                                                               | Proof of technology demonstration,                               | Physician consult for ultrasound and intubation via video                                 | Non-commercial, Fast Star system, one                   | Storz Medipac                        | Primary outcome was user satisfaction with the system for                                                                                                                                                        |

|      |             |                                                                                                                                                                                                           |                                                           |                                                                                                                                           |                                           |               |                                                                                                                                                                                                                                    |
|------|-------------|-----------------------------------------------------------------------------------------------------------------------------------------------------------------------------------------------------------|-----------------------------------------------------------|-------------------------------------------------------------------------------------------------------------------------------------------|-------------------------------------------|---------------|------------------------------------------------------------------------------------------------------------------------------------------------------------------------------------------------------------------------------------|
|      |             | in a Mobile Telemedicine Consult                                                                                                                                                                          | simulation environment                                    | laryngoscope during EMS transport                                                                                                         | way video and two-way voice system        |               | supervision. All consultants indicated they would use the system to consult on EMS crews.                                                                                                                                          |
| 2017 | Van Oeveren | Telemedicine-Assisted Intubation in Rural Emergency Departments: A National Emergency Airway Registry Study                                                                                               | Prospective observational, emergency department patients  | Video telemedicine link for providers at rural hospitals                                                                                  | Non-commercial existing telemedicine link | Not specified | Reported that tele-mentoring was feasible and was being used as a backup in challenging intubations                                                                                                                                |
| 2011 | Walker      | The Use of Virtual Training to Support Insertion of Advanced Technology at Remote Military Locations                                                                                                      | Proof of technology demonstration, simulation environment | Use of video conferencing to guide Novice user through set up of technology and intubation.                                               | Non-commercial system                     | Storz C-Mac   | Proof that remote training and supervision can be used for intubation.                                                                                                                                                             |
| 2015 | Zeger       | A description of teaching methods using an on-site instructor versus a distant site instructor to train laryngoscopy to medical students in Hanoi, Vietnam, from Omaha, Nebraska, by video communication. | Proof of technology demonstration, simulation environment | Comparison of in person training and supervision compared to remote training and supervision for intubation performed by medical students | Vidyo Link                                | Storz C-Mac   | Compared intubation success and time to intubation between two groups. The success rates between the two groups were similar but the time to intubation was longer in the remote supervision arm (no statistical comparison made). |
